# Supplementary material for: Dronedarone for Maintenance of Sinus Rhythm in Atrial Fibrillation or Flutter
Source: Atypon-hosted journal article supplement (doi:10.1056/nejmoa054686), 2007-09-05
Supplement: nejm_singh_987sa1.pdf [file nejm_singh_987sa1.pdf]

## Supplementary Appendix

This appendix has been provided by the authors to give readers additional information about their work.

Supplement to: Singh BN, Connolly SJ, Crijns HJGM, et al. Dronedaronone for maintenance of sinus rhythm in atrial fibrillation or flutter. *N Engl J Med* 2007;357:987-99.

**Online Supplementary Appendix (1). Effects of Dronedarone on Heart Rate and QT Intervals Compared to Placebo**

| Parameter         | Criteria                                                   | EUROPEAN TRIAL   |                                 | NON-EUROPEAN TRIAL |                                 | COMBINED         |                                 |
|-------------------|------------------------------------------------------------|------------------|---------------------------------|--------------------|---------------------------------|------------------|---------------------------------|
|                   |                                                            | Placebo (N= 201) | Dronedarone 400 mg BID (N= 411) | Placebo (N= 208)   | Dronedarone 400 mg BID (N= 417) | Placebo (N= 409) | Dronedarone 400 mg BID (N= 828) |
| Heart rate (bpm)  | N                                                          | 149              | 306                             | 149                | 323                             | 298              | 629                             |
|                   | Baseline : Mean (SD)                                       | 63.2 (10.5)      | 64.5 (10.4)                     | 63.6 (11.1)        | 64.3 (10.5)                     | 63.4 (10.8)      | 64.4 (10.5)                     |
|                   | D21 : Mean (SD)                                            | 63.5 (11.7)      | 60.7 (10.2)                     | 64.1 (11.9)        | 59.1 (10.5)                     | 63.8 (11.8)      | 59.9 (10.4)                     |
|                   | Change from baseline (a)<br>Treatment effect (a) : p-value | -0.1             | -3.5<br>0.0002                  | 0.4                | -5.1<br><.0001                  | 0.2              | -4.4<br><.0001                  |
| QRS interval (ms) | N                                                          | 149              | 303                             | 148                | 323                             | 297              | 626                             |
|                   | Baseline : Mean (SD)                                       | 91.8 (17.7)      | 91.6 (16.3)                     | 90.0 (18.0)        | 90.7 (18.2)                     | 90.9 (17.9)      | 91.1 (17.3)                     |
|                   | D21 : Mean (SD)                                            | 92.5 (17.7)      | 91.7 (16.0)                     | 90.1 (16.2)        | 91.3 (17.6)                     | 91.3 (17.0)      | 91.5 (16.8)                     |
|                   | Change from baseline (a)<br>Treatment effect(a) : p-value  | 0.7              | 0.1<br>0.579                    | -0.0               | 0.7<br>0.521                    | 0.3              | 0.4<br>0.954                    |
| QT interval (ms)  | N                                                          | 133              | 278                             | 132                | 283                             | 265              | 561                             |
|                   | Baseline : Mean (SD)                                       | 395.6 (36.8)     | 398.8 (37.1)                    | 406.4 (46.8)       | 402.1 (41.3)                    | 401.0 (42.3)     | 400.5 (39.3)                    |
|                   | D21 : Mean (SD)                                            | 396.1 (34.4)     | 420.4 (38.5)                    | 400.4 (38.3)       | 427.4 (42.5)                    | 398.2 (36.4)     | 424.0 (40.7)                    |
|                   | Change from baseline (a)<br>Treatment effect (a) : p-value | -0.3             | 22.0<br><.0001                  | -4.9               | 24.8<br><.0001                  | -2.6             | 23.4<br><.0001                  |
| QTc Bazett (ms)   | N                                                          | 133              | 278                             | 132                | 283                             | 265              | 561                             |
|                   | Baseline : Mean (SD)                                       | 404.0 (33.7)     | 409.2 (33.3)                    | 413.9 (36.6)       | 413.0 (34.6)                    | 408.9 (35.5)     | 411.1 (34.0)                    |
|                   | D21 : Mean (SD)                                            | 404.8 (27.2)     | 419.6 (31.3)                    | 409.6 (33.7)       | 419.6 (33.6)                    | 407.2 (30.7)     | 419.6 (32.5)                    |
|                   | Change from baseline (a)<br>Treatment effect (a) : p-value | -1.0             | 11.2<br><.0001                  | -4.0               | 6.5<br>0.0002                   | -2.4             | 8.8<br><.0001                   |

\*Plus-minus values are means  $\pm$  SD (standard deviation). AF = atrial fibrillation; AFL = atrial flutter; HR = hazard ratio; CI = confidence interval; TTM = transtelephonic monitoring; ms = milliseconds; (a) = change from baseline and treatment effect (difference between dronedarone 800 mg and placebo groups) are adjusted for baseline values.

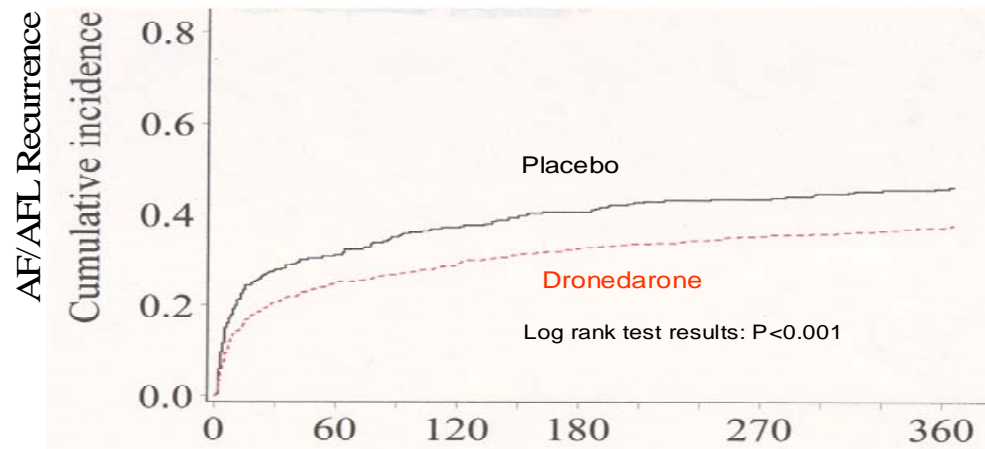

**No. at risk:**

|                         |     |     |     |     |     |     |
|-------------------------|-----|-----|-----|-----|-----|-----|
| Placebo                 | 409 | 192 | 156 | 133 | 112 | 90  |
| Dronedaron<br>400mg BID | 828 | 450 | 389 | 347 | 307 | 262 |

**Online Supplementary Appendix (2). Prentice Incidence Curves for the Adjudicated First Symptomatic Atrial Fibrillation or Flutter Recurrence in Patients in the EUROPEAN and the NON-EUROPEAN TRIALS (Pooled data).**

The time to recurrence of symptomatic atrial fibrillation or flutter is shown for the dronedaron and placebo groups in EURIDIS and ADONIS combined. AF/AFL denotes atrial fibrillation and atrial flutter respectively.
